## 27 INTRODUCTION

28 Two types of degeneracy families are essentially present in the genetic code table: fourfold  
29 degenerate families and two-fold degenerate families. Degeneracy stems from the tolerance of  
30 non-Watson-Crick (WC) base pairs at the third position of the codons. In mitochondria and  
31 other small genome entities, the extent of this tolerance often fully overlaps with degeneracy,  
32 implying that the number of different tRNAs required to translate all amino-acid encoding  
33 codons is minimal. Thus, in yeast and human mitochondria, all codons in any four-fold  
34 degenerate codon family are translated by a single tRNA (that most often has an unmodified U  
35 in pos. 34), while two tRNAs are required for the translation of either purine-ending or  
36 pyrimidine-ending codons in contiguous two-fold degenerate families (Bonitz et al. 1980,  
37 Suzuki et al. 2020). These two possibilities are respectively referred to as ‘superwobbling’ and  
38 ‘wobbling’ (Rogalski et al. 2008). Based on a structural analysis of parameters identified by U.  
39 Lagerkvist (Lagerkvist 1978), it was demonstrated that the level of stability of the WC geometry  
40 of the base pair at the second position of the anticodon ( $N_{35}-N_2$ ) determines the distribution of  
41 these two categories of degeneracy in the entire genetic code table (Lehmann and Libchaber  
42 2008). Three sets of hydrogen bonds contribute to the stabilization of  $N_{35}-N_2$ :

- 43 (1) The number of hydrogen bonds established by the base pair itself ( $N_{35}-N_2$ ), necessarily WC.
- 44 (2) The number of hydrogen bonds established by the WC base pair at the first codon position  
45 ( $N_{36}-N_1$ ).
- 46 (3) The strong hydrogen bond between  $U_{33}$  2’OH and  $N_{35}$ , that only occurs when  $N_{35}$  is a purine  
47 (R) (Auffinger and Westhof 2001).

48 Considering the sum  $S$  of hydrogen bonds defined in 1-3, it was shown that when  $S \leq 5$ , the  
49 considered codon belongs to a two-fold degenerate family, while it belongs to a four-fold  
50 degenerate family if  $S > 5$  (Lehmann and Libchaber 2008). The WC geometry of  $N_{35}-N_2$  is  
51 critical: it enables the decoding center to adopt a configuration leading to ribosome closure  
52 (Ogle et al. 2001, 2002), which triggers GTP hydrolysis on EF-Tu and the subsequent release  
53 of the tRNA for accommodation (Voorhees et al. 2010). This geometry can be perturbed by  
54 non-WC base pairs at the third position of the codons. The model shows that penalizing  $N_{34}-N_3$   
55 mismatches can sufficiently alter that geometry to prevent the decoding center from adopting a  
56 productive configuration. With  $S > 5$ , any perturbation by the four possible base pairs at the  
57 third position is contained by  $N_{35}-N_2$ , and superwobbling is possible, whereas base pairing is  
58 restricted to simple wobbling when  $S \leq 5$ , which has allowed the encoding of two different  
59 amino acids (or an amino acid and the stop function) by the considered  $N_1N_2$  doublet during  
60 the expansion of the initial genetic code. At the time when this model was published, the

61 dynamics of the decoding center was unknown, and its three residues (A1493, A1492 and G530)  
62 were assumed to be either all in the OFF or all in the ON state (resp. *syn* and *anti* for G530),  
63 the latter case corresponding to a situation where they are tightly packed and form hydrogen  
64 bonds along the minor groove of the anticodon-codon complex. In that state, the ribosome is  
65 engaged to accept the tRNA (Ogle et al. 2001, 2002, Schmeing et al. 2009, Voorhees et al.  
66 2010). This *a priori* type of dynamics implied that an essential aspect of the model was  
67 unsatisfactory: in the all-OFF state, the respective contributions of the hydrogen bonds of N<sub>36</sub>-  
68 N<sub>1</sub> and N<sub>35</sub>-N<sub>2</sub> to the stability of the N<sub>35</sub>-N<sub>2</sub> base pair were identical, which was physically  
69 implausible (a remarkable property of the parameters is that only their sum determines  
70 degeneracy, implying that they are *equivalent*). To resolve this inconsistency, it was envisioned  
71 (although not clearly stated) that residue A1493 would *always* bind to the minor groove of N<sub>36</sub>-  
72 N<sub>1</sub> when N<sub>36</sub>-N<sub>1</sub> and N<sub>35</sub>-N<sub>2</sub> were complementary, even in the occurrence of penalizing  
73 mismatch at the third position. This binding (A minor, type I) is stronger with G<sub>36</sub>-C<sub>1</sub> or C<sub>36</sub>-G<sub>1</sub>  
74 as compared to A<sub>36</sub>-U<sub>1</sub> or U<sub>36</sub>-A<sub>1</sub>, thereby amplifying the difference already present between  
75 these pairs. A structural context with N<sub>36</sub>-N<sub>1</sub> as a triple base pair (N<sub>36</sub>-N<sub>1</sub>-A<sub>1493</sub>) would explain  
76 why N<sub>35</sub>-N<sub>2</sub> and N<sub>36</sub>-N<sub>1</sub> had an apparent similar weight in the stability of the N<sub>35</sub>-N<sub>2</sub> base pair.  
77 It implied, however, that the decoding center would be already partially ON even though the  
78 tRNA could still be rejected by the ribosome.

79 Here we show that the possibility of the ‘partially ON’ configuration of the decoding center is  
80 confirmed by cryo-EM analyses of Loveland et al. (2017) and Fislage et al. (2018), which  
81 allows us to strengthen and extend the conclusions of the initial analysis (Lehmann and  
82 Libchaber 2008). These studies identified three different stages of the decoding center in the  
83 timeline from initial tRNA binding down to ribosome closure. In the intermediate stage, during  
84 which a tRNA is tested for anticodon-codon complementarity by the decoding center, all three  
85 examined configurations (cognate and near-cognate with either G<sub>35</sub>-U<sub>2</sub> or A<sub>36</sub>-C<sub>1</sub> mismatch)  
86 show that A1493 is in minor groove binding position, with a clear binding occurring in the  
87 cognate and G<sub>35</sub>-U<sub>2</sub> cases. These new data allow us to reanalyse the specific roles of all three  
88 residues of the decoding center in terms of their contributions to both degeneracy and induced  
89 fit. In agreement with evolutionary models, we show that their dynamics suggests an early  
90 appearance of A1493 and A1492 on the ribosome at a time when no catalytic site was present  
91 and when an early kinetic scheme of translation that did not include tRNA accommodation was  
92 prevailing. In this early kinetic scheme, inferred from a physico-chemical correlation in the  
93 genetic code, our analysis suggests that the initial role of A1493 and A1492 was to allow a  
94 relaxation of base pairing specificity at the third position of the codons through the

95 compensatory strengthening they implemented at the first position, which gave rise to  
96 degeneracy. Kinetics considerations suggest that the peptidyl transferase center (PTC) was the  
97 next major acquisition by the ribosome, while proofreading (Hopfield 1974, Ninio 1975,  
98 Thompson and Stone 1977) arose at a later stage with the initial form of EF-Tu•GTP. It  
99 logically follows that the controlled hydrolysis of EF-Tu's GTP through 30S closure by induced  
100 fit was a latecomer mechanism, implemented when G530 was acquired by the decoding center.

101

## 102 **RESULTS**

103

### 104 **The structural model of degeneracy is consistent with cryo-EM data**

105 Recent cryo-EM investigations on the decoding mechanism of the ribosome have allowed the  
106 identification of three different states of the decoding center and the A-site tRNA in the timeline  
107 from initial tRNA ribosome binding down to 30S closure (Loveland et al. 2017, Fislage et al.  
108 2018). Following Fislage et al.'s notations (see Figure 7 of their publication), these states are:  
109 initial tRNA binding, tRNA sampling and engaged state, the latter state corresponding to a  
110 closed 30S subunit, in which the ribosome commits to accept a tRNA. The structures show that  
111 with a single mismatch at either the first or the second position of the codon, or in the cognate  
112 case, residue A1493 moves to and remains in the 'ON' position during tRNA sampling, i.e.  
113 flipped out of helix 44 and in N<sub>36</sub>-N<sub>1</sub> minor groove binding position. With a A<sub>36</sub>-C<sub>1</sub> mismatch  
114 at the first position, A1493 does not form hydrogen bonds with the minor groove, no AC pair  
115 being formed (Fig. 1A). With a G<sub>35</sub>-U<sub>2</sub> mismatch at the second position, a A<sub>36</sub>-U<sub>1</sub> base pair  
116 does form, and A1493 binds to its minor groove, although none of its three hydrogen bonds is  
117 optimal (Fig. 1B). In the cognate case, A1493 binds to the minor groove and forms h-bonds  
118 during tRNA sampling (Fig. 1C). There is no existing structure with a forbidden base pair at  
119 the third position only, for which the model predicts that A1493 would, likewise, bind to the  
120 first base pair during tRNA sampling. The above data, however, clearly support this possibility.

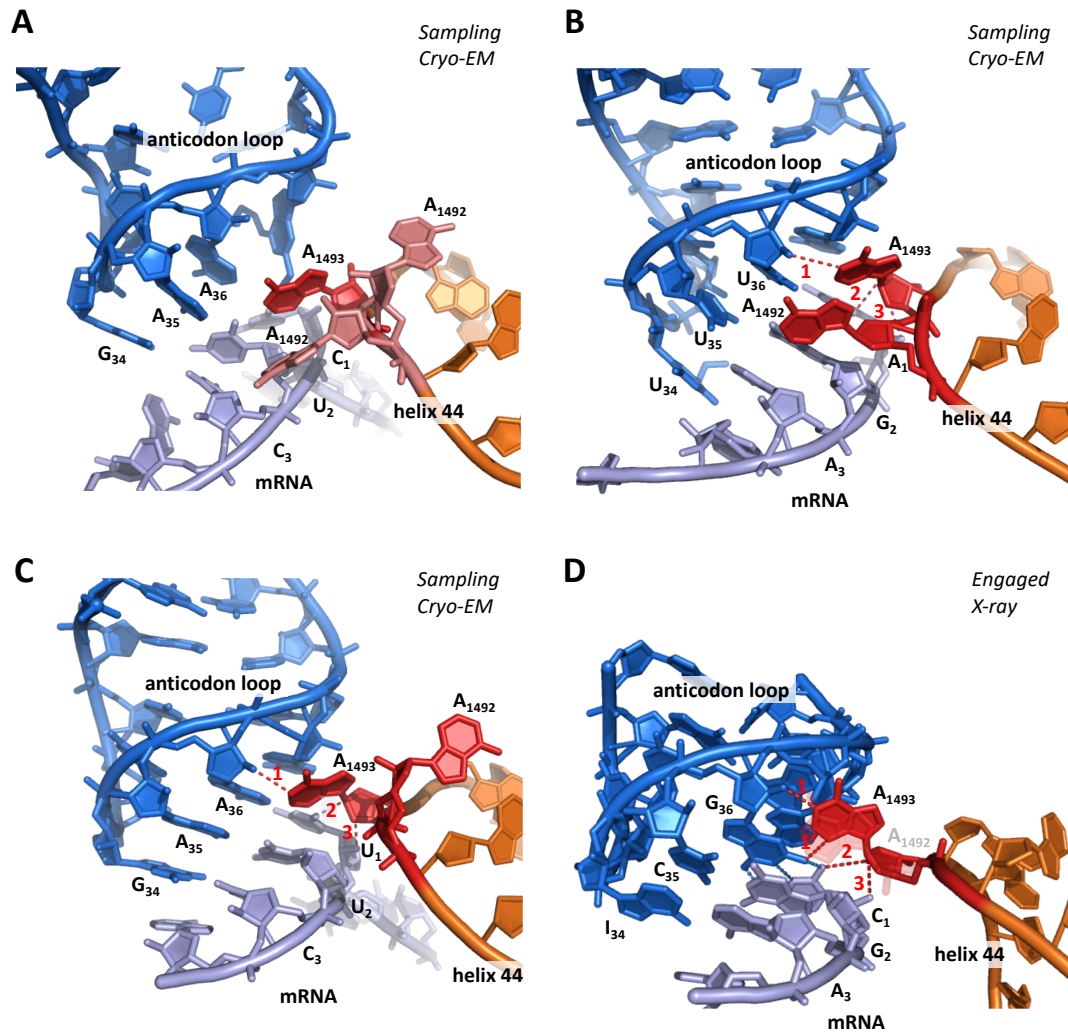

121  
 122 **Figure 1. Cryo-EM (A-C) and X-ray (D) structures of anticodon-mRNA complex within the decoding center**  
 123 **of the ribosome (for clarity, G530 and helix h18 are not shown). A) Non-cognate interaction, with AC**  
 124 **mismatch at the first position in the state of tRNA sampling (pdb 5wfk, Fislage et al. 2018). Although A1493**  
 125 **is ON, no hydrogen bond with the minor groove can occur. CryoEM resolution is 3.4 Å. B) Non-cognate**  
 126 **interaction, with GU mismatch at the second position in the state of tRNA sampling (pdb 5uyp, Loveland**  
 127 **et al. 2017). A1493 binds to the minor groove. Hydrogen bond D-A lengths are 1: 3.6 Å; 2: 3.0 Å; 3: 4.5 Å**  
 128 **(avg.: 3.7 Å). CryoEM resolution is 3.9 Å. C) Cognate interaction in the state of tRNA sampling (pdb 5uyl,**  
 129 **Loveland et al. 2017). A1493 binds to the minor groove. Hydrogen bond D-A lengths are 1: 3.0 Å; 2: 3.1 Å;**  
 130 **3: 3.8 Å (avg.: 3.3 Å). CryoEM resolution is 3.6 Å. D) X-ray structure of a cognate interaction (pdb 1xnq,**  
 131 **Murphy and Ramakrishnan 2004) illustrating an A minor interaction with a GC base pair at the first**  
 132 **position. Hydrogen bond D-A lengths are 1: 2.6 Å; 1': 2.9 Å; 2: 3.3 Å; 3: 2.5 Å (avg.: 2.8 Å). Compared to**  
 133 **pdb 5uyl, examination of the 5uym pdb structure suggests that the shorter length of these bonds results**  
 134 **from A1493 and A1492 being both bound to the anticodon-codon complex. Xray resolution is 3.05 Å. In**  
 135 **order to highlight hydrogen bonds, the angle of view was tilted compared to the other structures, and A1492**  
 136 **is semi-transparent. Overall, A1492 is found about 50% of the time in the 'ON' state during tRNA sampling**  
 137 **(Fislage et al. 2018). Specific densities of A1492 are such that it is 50% ON/50% OFF in the 5wfk structure**  
 138 **(light pink), ON in the 5uyp structure (red) and OFF in the 5uyl structure (red).**

139 Because the wobble position is two base pairs away from the A1493 binding site, a N<sub>34</sub>-N<sub>3</sub>  
140 mismatch generates a smaller perturbation at the A1493 binding site than a N<sub>35</sub>-N<sub>2</sub> mismatch,  
141 for which A1493 A minor binding during tRNA sampling is now confirmed (Fig. 1B). A  
142 complete demonstration would, however, require a structure with a base pair more penalizing  
143 than G<sub>34</sub>-U<sub>3</sub> at the third position, e.g. U<sub>34</sub>-U<sub>3</sub> or U<sub>34</sub>-C<sub>3</sub> (U<sub>34</sub> is almost always involved in  
144 superwobbling; Bonitz et al. 1980). In brief, cryo-EM analyses have revealed that the A1493  
145 residue of the decoding center binds to the minor groove of N<sub>36</sub>-N<sub>1</sub> during tRNA sampling if  
146 this base pair is Watson-Crick, a binding that *further stabilizes the complex* during the time it  
147 is tested by residues A1492 and G530 for 30S closure.

148

### 149 **Degeneracy in the genetic code is established through a major contribution by A1493**

150 The cryo-EM data of Loveland et al. and Fislage et al. allow us to refine the structural model  
151 of degeneracy previously described (Lehmann and Libchaber 2008). Figure 2A highlights the  
152 four different levels specifying the stability of the WC geometry of the N<sub>35</sub>-N<sub>2</sub> base pair during  
153 tRNA sampling in the situation when both N<sub>36</sub>-N<sub>1</sub> and N<sub>35</sub>-N<sub>2</sub> are complementary. The two  
154 lowest levels attribute a two-fold degeneracy to the corresponding codons, while the two  
155 highest levels attribute a four-fold degeneracy. As a result of the equivalence of Lagerkvist's  
156 parameters, levels 2 and 3 are degenerate in such a way that three configurations of hydrogen  
157 bonding patterns are possible. Remarkably, to each configuration correspond two sets of codons  
158 related by A<sub>1</sub> ↔ U<sub>1</sub> or G<sub>1</sub> ↔ C<sub>1</sub> permutations (indicated on each anticodon stem in Fig. 2A).  
159 Consequently, when A<sub>1</sub> (G<sub>1</sub>) and U<sub>1</sub> (C<sub>1</sub>) are mirror ordered with respect to the center of the  
160 table (dashed line), the two degeneracy families are also symmetrically arranged with respect  
161 to the center (Fig. 2B).

162 According to the analysis, the most remarkable effect that occurs when both N<sub>36</sub>-N<sub>1</sub> and N<sub>35</sub>-  
163 N<sub>2</sub> are complementary is the *positive* selection of tRNAs enforced by A1493: the strengthening  
164 of N<sub>35</sub>-N<sub>2</sub> resulting from N<sub>36</sub>-N<sub>1</sub> A minor binding enables the acceptance of some tRNAs with  
165 non-WC base pairs at the third position, whereas tRNAs are counterselected when N<sub>36</sub>-N<sub>1</sub>  
166 and/or N<sub>35</sub>-N<sub>2</sub> are not complementary (Ogle et al. 2001, 2002, Loveland et al. 2017, Fislage et  
167 al. 2018). The involvement of A1493 in degeneracy provides an explanation for why  
168 Lagerkvist's parameters are equivalents (Fig. 2A): each increase in the level of stability of N<sub>35</sub>-  
169 N<sub>2</sub> occurs upon the addition of either 1 *local* hydrogen bond (U<sub>33</sub>-N<sub>35</sub> or N<sub>35</sub>-N<sub>2</sub>, in blue) or 2  
170 hydrogen bonds on the *neighboring* triple base pair (N<sub>36</sub>-N<sub>1</sub>-A<sub>1493</sub>, one in blue and one in red),  
171 revealing that these two possibilities are equivalent in term of the added stability to N<sub>35</sub>-N<sub>2</sub>.

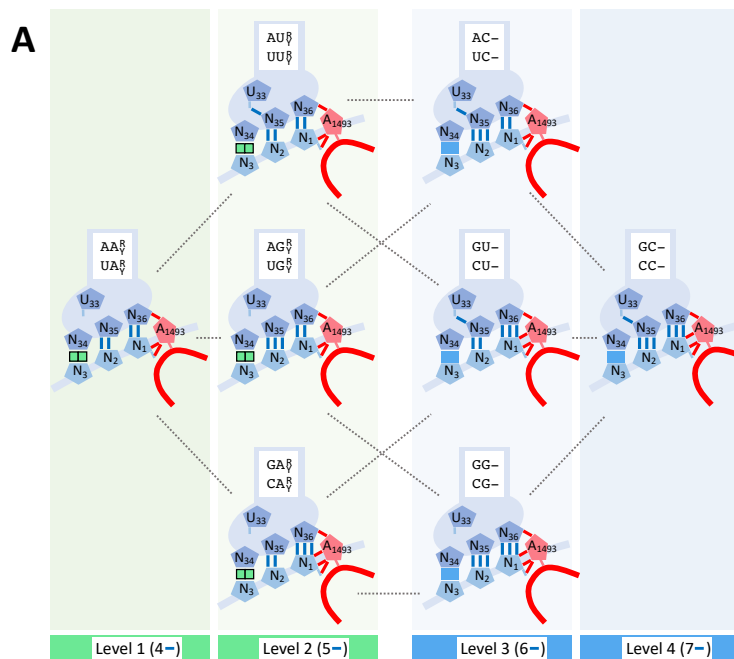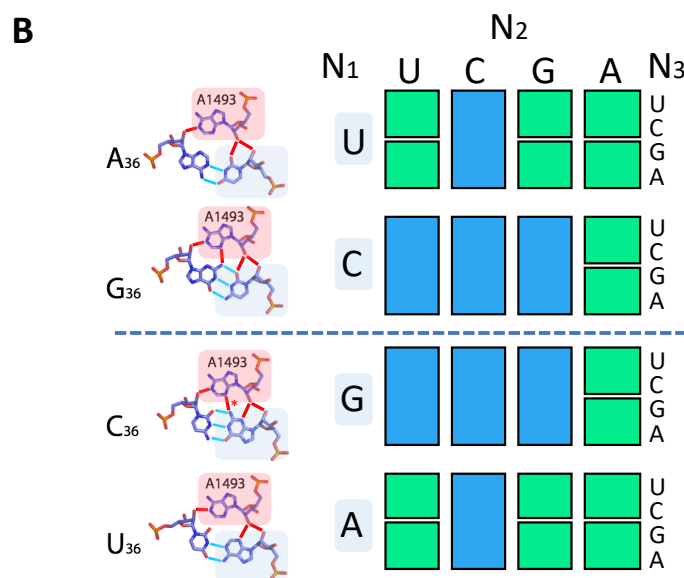

172

173 **Figure 2. Relation between hydrogen bonding patterns involved in the stability of the WC geometry of N<sub>35</sub>-**  
 174 **N<sub>2</sub> and degeneracy. A) Levels of stability of the WC geometry of the N<sub>35</sub>-N<sub>2</sub> base pair during tRNA sampling,**  
 175 **as determined by hydrogen bonds associated with Lagerkvist's parameters (in blue) and residue A1493 (in**  
 176 **red). Levels 1 and 2 specify two-fold degenerate families (contiguous green boxes), while levels 3 and 4**  
 177 **specify four-fold degenerate families (blue boxes). B) Yeast or human mitochondria genetic code table**  
 178 **highlighting the two families of degeneracy (same color code as in A). Amino acids are not specified to point**  
 179 **out that they are not primarily involved in the determination of these families. The A minor interaction**  
 180 **between A1493 and N<sub>36</sub>-N<sub>1</sub> is shown on the left. All shown hydrogen bonding patterns were found in**  
 181 **experimental structures (see Fig. 1), except that of C<sub>36</sub>-G<sub>1</sub>-A1493, for which no structure could be identified**  
 182 **in the pdb database. In that case, the only hypothetical hydrogen bond, highlighted with an asterisk\*, is**  
 183 **expected to occur similarly as for the G<sub>36</sub>-C<sub>1</sub>-A1493 configuration due to the position of the G<sub>1/36</sub>(C<sub>1</sub>-NH<sub>2</sub>)**  
 184 **amino group at the center of the base pair.**

185 A striking aspect of the model is that no stacking parameter is required. It suggests that the high  
186 number of hydrogen bonds involved (7 to 11) confer structural energies that dominate over the  
187 variability of the stacking interaction, which further corroborates the implication of A1493 in  
188 degeneracy. The number of these hydrogen bonds is invariant upon  $A_1 \leftrightarrow U_1$  or  $G_1 \leftrightarrow C_1$   
189 permutations. In the case of  $G_{36}-C_1$  and  $C_{36}-G_1$ , this property stems from the position of the  
190  $G_{1/36}(C_1-NH_2)$  amino group at the center of the base pair (Figs. 1D and 2B). Although stacking  
191 is not a parameter,  $N_{37}$  stabilizes the  $N_{36}-N_1$  base pair by stacking on it, an effect that is optimal  
192 since this base is a conserved purine (Auffinger and Westhof 2001). Stabilization is further  
193 enhanced when  $N_{37}$  is modified (Grosjean et al. 1998; Konevega et al. 2004, Jenner et al. 2010,  
194 Grosjean and Westhof 2016), and the extent of modification negatively correlates with the G+C  
195 composition of the anticodon (Grosjean et al. 1998, Grosjean and Westhof 2016), indicating  
196 that this base also contributes to an adjustment of the overall stability of each anticodon-codon  
197 interaction, and is thus likely a hidden requirement to the observed degeneracy. Deformation  
198 of the tRNA body has also been shown to affect the extent of wobbling at the third position (see  
199 summary and discussion Section). With regard to the present analysis, the *directional* nature of  
200 hydrogen bonds plausibly explains why they play a predominant role in the stability of the  
201 *geometry* of the  $N_{35}-N_2$  WC base pair, which is the decisive criteria for ribosome closure  
202 (Loveland et al. 2017, Fislage et al. 2018). In a situation relevant to degeneracy (Fig. 2A), this  
203 geometry is preserved if the network of hydrogen bonds stabilizing  $N_{35}-N_2$  is strong enough to  
204 contain the perturbation generated by a given non-canonical  $N_{34}-N_3$  base pair.

205

### 206 **The induced-fit mechanism is a late acquisition of the decoding center**

207 The implication of A1493 in degeneracy shows that the implementation of unspecific pairing  
208 at the third position of the codons arose at the time when the ribosome acquired residue A1493  
209 on helix h44. Remarkably, two analyses suggest that the segment of h44 where A1493 and  
210 A1492 are located appeared early in the evolution of the ribosome, whereas helix h18,  
211 harboring G530, emerged at a much later stage (Harish and Caetano-Anollés 2012, Petrov et al.  
212 2015) (Fig. 3A). The latter residue has a major role in the induced-fit mechanism: it drives 30S  
213 closure (Loveland et al. 2017, Fislage et al. 2018), which triggers GTP hydrolysis on EF-Tu,  
214 thereby releasing the incoming tRNA for accommodation (Voorhees et al. 2010, Kavaliauskas  
215 et al. 2018). The mentioned models on ribosome evolution are thus consistent with the induced  
216 fit of the decoding center being, logically, established later than degeneracy. The connection  
217 between the successive emergence of helices h44 and h18 and these fundamental aspects of  
218 translation must be underscored. The mechanism itself reflects this evolutionary succession:



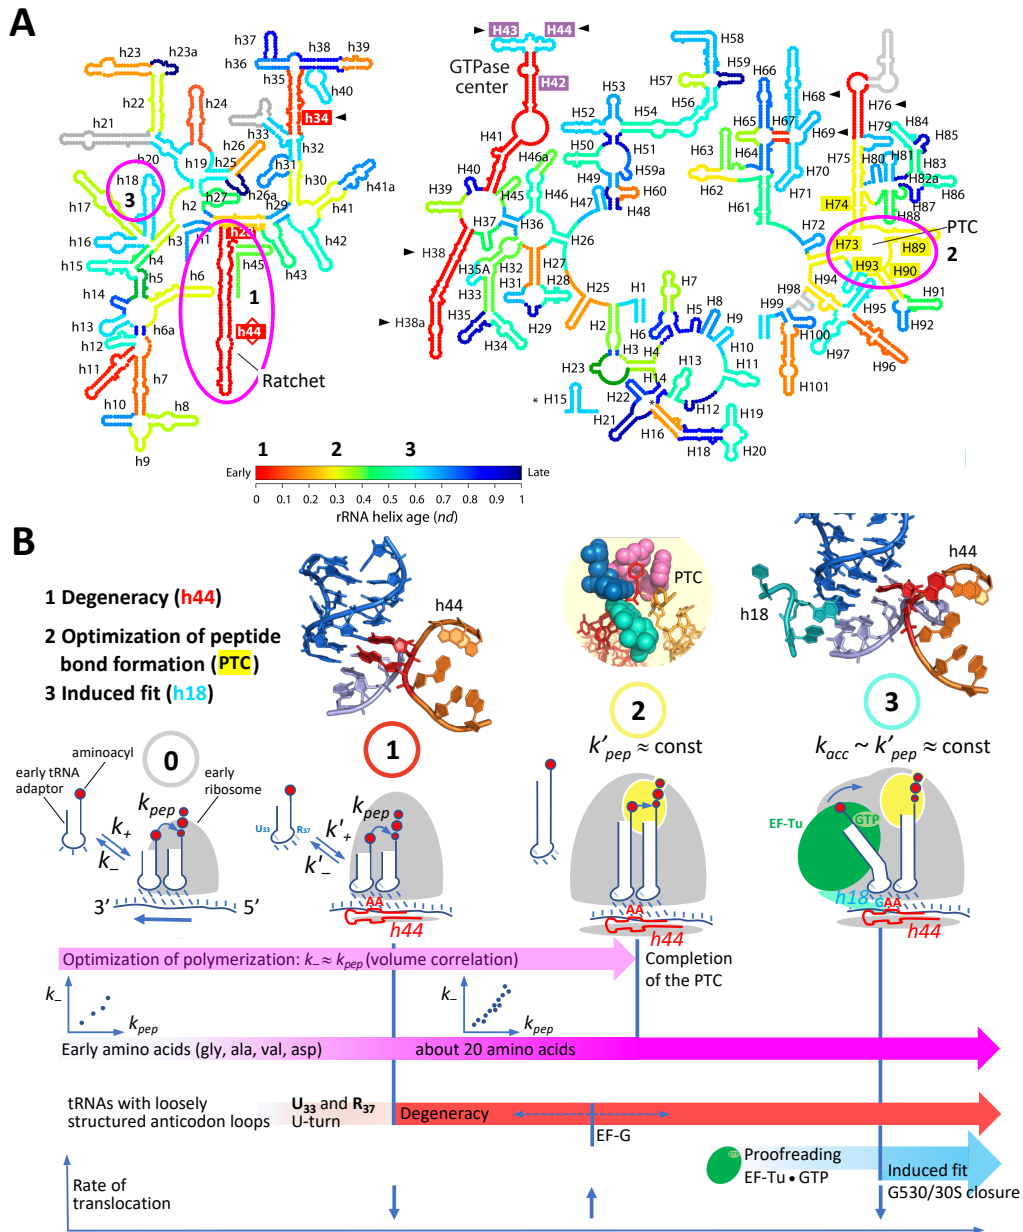

219

220 **Figure 3. Evolution of rRNA structures in the model of Harish and Caetano-Anollés and evolution of**  
 221 **decoding in translation based on the analysis of degeneracy. A) rRNA evolution. Three specific helices (or**  
 222 **groups of helices) involved in transitions in the evolutionary model of decoding are highlighted. Adapted**  
 223 **from Harish and Caetano-Anollés (2012). B) Evolutionary model of decoding on the ribosome. From the**  
 224 **origin until the advent of the PTC, a Michaelis-Menten type of kinetic inferred from the volume correlation**  
 225 **(Lehmann 2000) governs the rate of translation, with tRNA association ( $k_+$ ) and dissociation ( $k_-$ ) rate**  
 226 **constants, and a kinetic constant of peptide bond formation ( $k_{pep}$ ), sometimes called  $k_{cat}$  in earlier works**  
 227 **(Lehmann 2000, 2018, Lehmann et al. 2009). The advent of U<sub>33</sub> and R<sub>37</sub>, as well as helix h44 (A1493 & A1492)**  
 228 **modulated these kinetic constants ( $k'_+$ ,  $k'_-$ ). Relevant structural contexts are shown above each evolutionary**  
 229 **transition: decoding center with h44 only (1), peptidyl transferase center (PTC) (2) and whole decoding**  
 230 **center with helix h18 (3). See text for additional explanations. Note that all three considered transitions**  
 231 **highlighted in A and B concur, although these two models were established essentially independently.**

232 A1493 *first* binds to the minor groove, while A1492 fluctuates between ON and OFF states;  
233 *only then* can A1492 and G530 fully bind to the complex in the cognate case, thereby achieving  
234 ribosome closure (Loveland et al. 2017, Fislage et al. 2018).

235

### 236 **The appearance of A1493 generated a decoding transition on the ribosome**

237 The involvement of A1493 in degeneracy highlighted by the present analysis, and the coherence  
238 of the sequential buildup of the decoding center in the evolutionary models of Harish and  
239 Caetano-Anollés (2012) and Petrov et al. (2015) motivated us to outline a model of evolution  
240 of ribosomal decoding based on the identified role of A1493 and a plausible form of the earliest  
241 kinetic scheme of translation (Lehmann et al. 2009). This kinetic scheme (Fig. 3B, left) was  
242 established from an interpretation of a physico-chemical correlation in the genetic code called  
243 the volume correlation (Lehmann 2000, 2017, 2018). This correlation suggests that at the origin  
244 of translation, the lifetime of the association between a tRNA and a complementary codon was  
245 about equal to the characteristic time required by the aminoacyl carried by this tRNA to make  
246 a peptide bond, which was side-chain dependent. This adjustment, which can be expressed with  
247 kinetic constants as  $k_{\text{anticodon-codon}} \approx k_{\text{pep aminoacyl}}$ , implies that the aminoacyls were in immediate  
248 position for forming a peptide bond upon tRNA codon binding —i.e. there was no tRNA  
249 accommodation at the origin— while not being confined inside a catalytic site, which would  
250 have standardized the  $k_{\text{pep aminoacyl}}$ s to an approximately uniform value, an action that is achieved  
251 by the peptidyl transferase center (PTC) of modern ribosomes (Lehmann 2017). An elementary  
252 Michaelis-Menten kinetic scheme comprising the above kinetic constants best encapsulates  
253 these features (Fig. 3B, left). An analysis shows that in this model, the rate of translation is  
254 optimal precisely when  $k_{\text{anticodon-codon}} \approx k_{\text{pep aminoacyl}}$  occurs for all tRNA:aminoacyl couples  
255 (Cibils et al. *in prep.*). As this analysis has not yet been published, this property is left here as  
256 a conjecture.

257 In the context defined by this model of the early translation, a straightforward consequence of  
258 the strengthening of the N<sub>36</sub>-N<sub>1</sub> base pair that occurred when A1493 became functional on h44  
259 was a relaxation of base pairing specificity at the third position of the codons, a rebalancing  
260 scheme that would have overall preserved the  $k_{\text{anticodon-codon}}$ s, and thus the rate of translation.  
261 In a context of a limited variety of tRNAs, this action of A1493 presumably led to an increase  
262 in the processivity and accuracy of translation, discussed below.

263 Because a mismatch perturbs the geometry and stability of neighboring base pairs along a  
264 double helix, the type I A minor binding achieved by A1493 could have been optimal only at

265 the first position, i.e. two base pairs away from the third position (where tolerated mismatches  
266 would occur), which may explain why this solution was selected.

267 Although current models of ribosome evolution may not predict whether A1493 and A1492  
268 were both initially present on h44 (Harish and Caetano-Anollés 2012, Petrov et al. 2015), this  
269 possibility is plausible since the dynamics of A1493 would likely be altered without A1492,  
270 and the type II A minor binding achieved by A1492 (Ogle et al. 2001), which is more tolerant  
271 to mismatch (it does not bridge over N<sub>35</sub>-N<sub>2</sub>), may contribute to N<sub>36</sub>-N<sub>1</sub> stabilization. This  
272 binding occurs ~50 % of the time during tRNA sampling (Fislage et al. 2018). In that state, the  
273 tRNA is partially bent, a feature associated with presence of EF-Tu that allows an optimal  
274 substrate selection through deformation (Yarus et al. 2003, Savir and Tlusty 2007, Schmeing et  
275 al. 2009, Schmeing et al. 2011, Savir and Tlusty 2013). Because EF-Tu, an elaborate protein  
276 cofactor, could not have occurred at the origin of translation (which is consistent with an  
277 absence of tRNA accommodation, inferred from the volume correlation), it can be maintained  
278 that the stem of initial tRNA adapters did not undergo such deformation. In that case, A1492  
279 would bind 100% of the time to the complex upon tRNA codon association, similarly as it does  
280 with fully accommodated tRNAs on modern ribosomes. A fully bound A1492 may contribute  
281 to an optimal strengthening mediated by A1493 in the situation when both N<sub>36</sub>-N<sub>1</sub> and N<sub>35</sub>-N<sub>2</sub>  
282 are Watson-Crick.

283 Structural and functional considerations suggest that both the processivity and accuracy of  
284 translation increased when residues A1493 and A1492 became functional on helix h44:

285

286 *Processivity of translation:*

287 In the proposed Michaelis-Menten kinetic scheme of the initial translation (Fig 3B), the  
288 relaxation in base pairing specificity that occurred at the third position of the codons through  
289 the action of A1493 and A1492 may have allowed a given set of different transfer tRNAs,  
290 necessarily limited at the origin, to be more tolerant to mutations incorporated at the third  
291 position during replication (Fig. 4), and thus translate longer sequences.

292 As there was initially no strong geometrical requirement for the base pair at the second position  
293 in the absence of G530 and induced-fit mechanism, unspecific base pairing at the third position,  
294 that perturb the N<sub>35</sub>-N<sub>2</sub> geometry, was plausibly less stringent than that occurring on modern  
295 ribosomes. A1493 and A1492 binding would compensate for the loss in anticodon-codon  
296 stability generated by mismatches at the third position within a simple rebalancing scheme (Fig.  
297 4A).

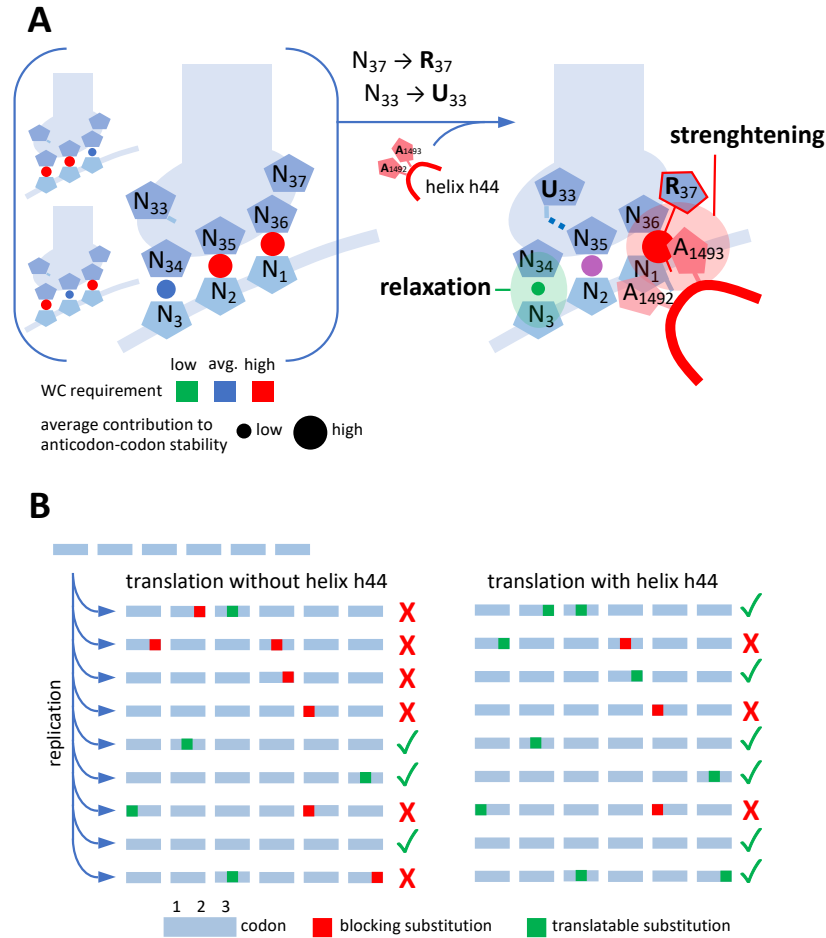

298

299 **Figure 4. Evolutionary transition 1: from early tRNA anticodon loops and no decoding center to U<sub>33</sub> and**  
 300 **R<sub>37</sub>-shaped anticodon loops and helix h44 on the ribosome (A1493 and A1492). A) Left: initial loop of tRNA**  
 301 **adapter, with little structuration, bound to a codon in an absence of decoding center. Although the shape of**  
 302 **the loop might provide a high flexibility to the base pair at the 3<sup>rd</sup> position, single GU wobble base pairs**  
 303 **could occur in pos. 2 or 1 (background) while still providing enough stability to ensure peptide bond**  
 304 **formation in the early translation mechanism. Right: the advent of R<sub>37</sub> and helix h44 strengthened the**  
 305 **anticodon-codon interaction at the 1<sup>st</sup> position, while the U-turn (U<sub>33</sub>) helped relax base pairing specificity**  
 306 **at the 3<sup>rd</sup> position. R<sub>37</sub> stacking on N<sub>36</sub>-N<sub>1</sub> is schematized with a thin red line. B) Translation of early coding**  
 307 **sequences: suggested improved processivity resulting from transition 1. Because the early replication**  
 308 **mechanism is inaccurate, RNA sequences accumulate mutations, and thus may not always be fully**  
 309 **translated due to reduced sets of tRNAs (left). The advent of h44 together with anticodon loop structuration**  
 310 **(see A) provided an improved processivity during translation by lowering base pairing requirement at the**  
 311 **third position (right).**

312

313 It suggests to us that the four codons belonging to any of the 16 N<sub>1</sub>N<sub>2</sub> doublets of the genetic  
 314 code may have been translated by a single tRNA upon the action of h44 in an all four-fold-  
 315 degeneracy regime following transition 1 (Fig. 5, center). This possibility does naturally not  
 316 imply that all 16 doublets were encoding amino acids, at least immediately following this early

317 transition. It is striking that the acquisition of R<sub>37</sub> and U<sub>33</sub> on the anticodon loop, that  
318 presumably also occurred early in the evolution of the tRNAs, respectively reinforced the N<sub>36</sub>-  
319 N<sub>1</sub> base pair through R<sub>37</sub> stacking and provided an extended conformational freedom to N<sub>34</sub> at  
320 the edge of the U-turn (Quigley and Rich 1976), in an apparent synergism with the effect of  
321 h44 (Fig. 4A). The early replication mechanism being inaccurate, the arising degeneracy most  
322 likely improved the processivity of translation among mutated copies of early RNA genes (Fig.  
323 4B). In the absence of decoding center, wobbling could occur at any codon position at the origin  
324 of translation (Fig. 4A, left), and thus lead to a miscoding that would be prohibitive to the  
325 emergence of Life. It has been suggested that a very limited codon and anticodon repertoire  
326 such as the ‘GNC’ code (where N is A, G, C or U) could overcome this issue while  
327 simultaneously managing frameshifting and frame indeterminacy at that stage (Eigen and  
328 Schuster 1978, Ikehara et al. 2002, Wang and Lehmann 2016) (Fig. 5, left).

329

330 *Accuracy of translation:* a GU wobble base pair is only slightly less stable than an AU base  
331 pair (Freier et al. 1986), but it is *tilted* compared to a regular WC base pair. In the context of  
332 the N<sub>36</sub>-N<sub>1</sub>-A<sub>1493</sub> triple base pair, no such degree of freedom is available due to *planar*  
333 constraints: in order for A<sub>1493</sub> to establish optimal hydrogen bonds with N<sub>36</sub>-N<sub>1</sub>, this base pair  
334 has to display a WC geometry (Ogle et al. 2001, Ogle et al. 2002). Thus, an increase in the  
335 dimensionality of the anticodon-codon complex is associated with an increased selectivity.  
336 Furthermore, Satpati et al. (2014) found out through molecular dynamic simulations that  
337 mismatches are penalized essentially as a result of water exclusion due to the binding of A<sub>1493</sub>,  
338 A<sub>1492</sub> and G<sub>530</sub>: missing hydrogen bonds occurring in mismatches cannot be compensated  
339 through hydrogen bonding with water. This effect could already partially occur without loop  
340 h18 and G<sub>530</sub>.

341 Another effect resulting from the action of h44 must be considered: because the A-site tRNA  
342 and the RNA template became caught by A<sub>1493</sub> and A<sub>1492</sub> upon anticodon binding, the rate  
343 of translocation necessarily slowed down (Fig. 3B, bottom). On modern ribosomes, the grip of  
344 the decoding center constitutes a barrier to translocation, which is overcome by the elongation  
345 factor EF-G and the free-energy available from the hydrolysis of a GTP (Katunin et al. 2002,  
346 Frank et al. 2007; Taylor et al. 2007, Liu et al. 2014). Without helix h18 and G<sub>530</sub>, translocation  
347 could still spontaneously occur through thermal fluctuations (Ling and Ermolenko 2016). A  
348 consistent evolutionary scenario is that an ancestor of EF-G came into the picture after the  
349 emergence of A<sub>1493</sub> and A<sub>1492</sub>, which would alleviate the early grip, and make the second  
350 transition to G<sub>530</sub> and proofreading possible by preventing a catastrophic slowdown of

351 translocation upon building of the full decoding center (Fig. 3B, bottom). During evolution, an  
 352 early fixation of R<sub>37</sub>, which makes an interstrand stacking and thus helps maintain the reading  
 353 frame, would also best ensure the maintenance of that frame upon appearance of A1493 and  
 354 A1492 (Figs. 3B and 4A). The subsequent appearance of EF-G and R<sub>37</sub> modifications would  
 355 further reduce frameshifting events during translocation (Konevega et al. 2004, Jenner et al.  
 356 2010, Liu et al. 2014, Zhou et al. 2019, Peng et al. 2019).

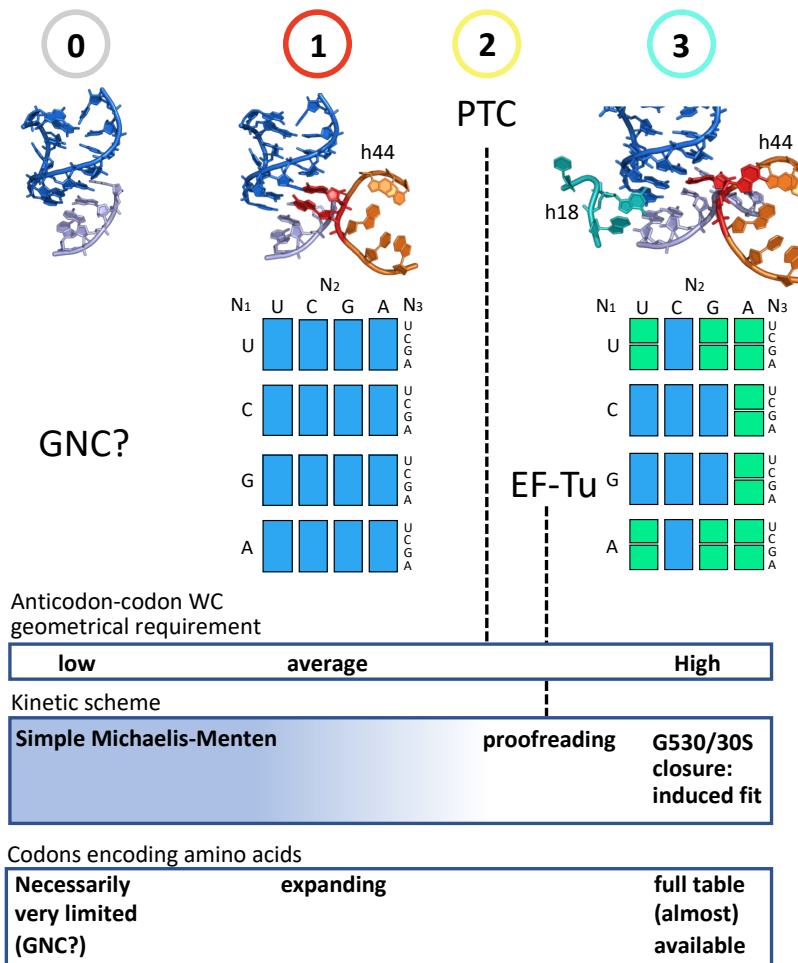

358  
 359 **Figure 5. Anticodon-codon interaction and codon degeneracy in the genetic code during ribosome evolution.**  
 360 From an early hypothetical structure with no decoding center (initial state, 0), in which the properties of a  
 361 GNC code may have provided a required stability to an early translation system (Eigen and Schuster 1978,  
 362 Wang and Lehmann 2016), evolutionary models and the dynamics of the decoding center suggest that helix  
 363 h44 with A1493 and A1492 appeared first (transition 1), which enabled an extended degeneracy at the third  
 364 position (blue boxes). The completion of the PTC (transition 2) and the appearance of EF-Tu (proofreading)  
 365 necessarily occurred before a controlled hydrolysis on EF-Tu by the decoding center through G530 and 30S  
 366 closure (transition 3), which gave rise to modern degeneracy. Inferred kinetic scheme and codons occurring  
 367 from stage 0 to transition 3 are indicated at the bottom.

368

## 369 **Co-evolution of the translation machinery and the genetic code**

370 This section summarizes and brings further justifications to the evolutionary model depicted in  
371 Figure 3B. Remarkably, all three major transitions highlighted in this scenario agree with the  
372 model of ribosome evolution proposed by Harish and Caetano-Anollés (2012) (Fig. 3A). While  
373 still being consistent with the model of Petrov et al. (2015), our analysis does not support a very  
374 early appearance of the PTC on the ribosome, as suggested by this study (see summary and  
375 discussion Section).

376 *Initial stage (0)*: although no strong evidence so far explains the origin of RNA and how the  
377 initial translation came about, the volume correlation in the genetic code (Lehmann 2000)  
378 suggests that the early translation was driven by a simple Michaelis-Menten kinetic scheme  
379 (Lehmann et al. 2009, Lehmann 2017, 2018). The fixation of U<sub>33</sub> and R<sub>37</sub> on the anticodon  
380 loops, that improved anticodon-codon associations and helped maintain the reading frame  
381 (Konevega et al. 2004), was plausibly an early acquisition on all tRNAs.

382 *First major transition (1)*: residues A1493 and A1492 appeared on helix h44. Together with  
383 U<sub>33</sub> and R<sub>37</sub>, they established the basis of modern degeneracy (Fig. 4 and Fig. 5, center).

384 *Second major transition (2)*: build-up of the PTC. Because this catalytic site confines the  
385 aminoacyls in a desolvated environment, the amino groups are more reactive (Johansson et al.  
386 2011). Furthermore, an induced-fit mechanism orients the aminoacyls for nucleophilic attack,  
387 which cancels the conformational freedom available to the amino group in solution, that is side-  
388 chain dependent (Lehmann 2017). As a consequence, all  $k_{pep \text{ aminoacyl}}$  are levelled up to an  
389 approximately uniform  $k'_{pep}$  value. Thus, at the time of the completion of the PTC, the [ $k_{\text{anticodon-codon}} \approx k_{pep \text{ aminoacyl}}$ ] optimization that had guided the establishment of the code became  
390 obsolete. Free from this constraint, the genetic code could evolve on its own, although codon  
391 reassignment is known to have occurred at an extremely low rate –otherwise, the volume  
392 correlation would have disappeared.

394 Because it would break the initial simple MM kinetic scheme (Fig. 3B, left), the EF-Tu cofactor  
395 could come into the picture only after the optimization of the  $k_{pep \text{ aminoacyl}}$  achieved by the PTC.  
396 In the absence of G530 and an induced-fit mechanism, an elementary form of proofreading  
397 would occur: most plausibly, GTP hydrolysis on EF-Tu, that leads to the release of the tRNA  
398 for accommodation (Kavaliauskas et al. 2018), was initially triggered by the docking of the  
399 tRNA•EF-Tu•GTP ternary complex onto the ribosome, following the simple clockwork  
400 mechanism envisioned by Ninio and Hopfield (Ninio 1975, Hopfield 1974, Thompson and  
401 Stone 1977), which is independent of the decoding center.

402 *Third major transition (3)*: appearance of helix h18 and the associated induced-fit mechanism  
403 (Pape et al. 1999), that involves G530 anticodon-codon latching and ribosome closure (Ogle et  
404 al. 2001, 2002, Voorhees et al. 2010, Loveland et al. 2017, Fislage et al. 2018). This large-scale  
405 rearrangement docks EF-Tu on the sarcin loop, which triggers GTP hydrolysis (Voorhees et  
406 al. 2010, Loveland et al. 2017). From the early simple proofreading mechanism (see above), a  
407 plausible evolutionary transition was a change in the structure of EF-Tu that set GTP hydrolysis  
408 under the conditional control of ribosome closure, thus *combining* induced fit with proofreading.  
409 Available data (Johansson et al. 2011, Juette et al. 2016) suggest that the kinetic constant of  
410 accommodation ( $k_{acc}$ ) is of the same order of magnitude as  $k'_{pep}$  at physiological pH on modern  
411 ribosomes (Fig. 3B, right), although this point still needs to be established experimentally.  
412 Because of its sensitivity, that is tuned by tRNA deformation (Yarus et al. 2003, Schmeing et  
413 al. 2009), the induced fit would allow a much sharper discrimination between cognate and near-  
414 cognate tRNA through optimal decoding (Yarus et al. 2003, Savir and Tlusty 2007, 2013,  
415 Schmeing et al. 2011), thus giving rise to modern degeneracy (Fig. 5 right). Base modifications,  
416 that could only occur at a late stage with modifying enzymes, will still be required to shape  
417 some tRNA anticodon loops so that they can be accepted by the decoding center (Blanchet et  
418 al. 2018), best prevent leaking wobbling between contiguous 2x degenerate codon families, and  
419 ensure reading frame maintenance during translocation.

420

## 421 **SUMMARY AND DISCUSSION**

422 Recent cryo-EM structures have revealed the dynamics of the decoding center of the ribosome  
423 during tRNA selection (Loveland et al. 2017, Fislage et al. 2018). Based on these results, the  
424 present work shows that residue A1493 of the decoding center plays a key role in degeneracy  
425 by strengthening the N<sub>36</sub>-N<sub>1</sub> base pair during tRNA sampling, which allows non-specific N<sub>34</sub>-  
426 N<sub>3</sub> pairings to be accepted by the ribosome. This possibility was suspected at the time of an  
427 earlier work on degeneracy (Lehmann and Libchaber 2008), although it remained unclear  
428 because the dynamics of the decoding center was unknown. We now conclude that degeneracy  
429 in the modern genetic code is established by a complex comprising the anticodon, the codon  
430 and A1493, while a clear-cut distinction between contiguous two-fold degenerate families  
431 requires the induced fit mediated by the whole decoding center and modifications on the tRNA  
432 anticodon loop.

433 It must be emphasized that degeneracy corresponds to a maximization of wobbling (Lehmann  
434 and Libchaber 2008), which requires specific tRNAs. Decoding in mitochondria suggests that  
435 a uridine in pos. 34 can almost always achieve superwobbling in four-fold degenerate families



436 (Bonitz et al. 1980, Rogalski et al. 2008, Suzuki et al. 2020), while some uridine modifications,  
437 such as uridine 5-oxyacetic acid, are known to further enhance this property (Näsvalld et al. 2004,  
438 Weixlbaumer et al. 2007). However, most bacteria and higher order organisms use more than  
439 one tRNA to translate all codons in four-fold degenerate codon families, either by modifying  
440 U<sub>34</sub> in such a way as to prevent superwobbling, by avoiding U in position 34, or by structural  
441 constraints (see below). Furthermore, in twofold degenerate codon families, U<sub>34</sub> modifications  
442 (e.g., xm<sup>5</sup>s<sup>2</sup>U derivatives) are always present, and are required to prevent “leaking” wobbling  
443 between families sharing identical nucleotides in pos. 1 and 2 (Yokoyama et al. 1985,  
444 Yokoyama and Nishimura 1995). Codon assignment was, therefore, partially ambiguous before  
445 the appearance of modifying enzymes (and still is to some extent). The advent of inosine might  
446 explain why AUR and AUY two-fold degenerate families further reorganized into AUG and  
447 AU/U,C,A codon boxes. More generally, the extent of wobbling –and, thus, degeneracy– is  
448 controlled by structural deformations required for the anticodon to achieve proper codon  
449 binding in the context specified by the ribosome and EF-Tu (Yarus et al. 2003, Savir and Tlusty  
450 2007, Schmeing et al. 2009, Schmeing et al. 2011, Savir and Tlusty 2013), which often requires  
451 base modifications (Blanchet et al. 2018).

452 Although the present analysis shows that hydrogen bonds determine the extent of degeneracy  
453 in the genetic code, experiments and molecular dynamic simulations suggest that steric  
454 complementarity between the decoding center and the anticodon-codon complex is more  
455 important than hydrogen bonds in the selection of cognate tRNAs (Khade et al. 2013, Schrode  
456 et al. 2017). There is, however, no fundamental contradiction between these two results: the  
457 network of hydrogen bonds involved in degeneracy contributes to the stabilization of the WC  
458 geometry at the second position, which is critical only when a non-canonical base pair occurs  
459 at the third position. The expected effect of missing hydrogen bonds is only a reduction of the  
460 extent of wobble base pairs accepted by the ribosome: in particular, superwobbling with U<sub>34</sub>  
461 that normally occur would be prohibited when specific hydrogen bonds are missing.

462 In the evolutionary scenario depicted in Figure 3B, the PTC emerges after helix h44 and before  
463 helix h18, in agreement with the analysis of Harish and Caetano-Anollés (2012) (Fig. 3A). This  
464 succession can be justified by the following: because the PTC levelled the kinetic constants of  
465 peptide bond formation up to similar  $k'_{pep}$  aminoacyl values, it cancelled the  $k_{-}$  anticodon-codon  $\approx k_{pep}$   
466 aminoacyl adjustment that had shaped the code from the origin (Lehmann 2000, 2017, 2018). This  
467 early optimization, the trace of which is the volume correlation (Lehmann 2000), could not  
468 have occurred if the PTC was already present at the origin of translation. According to the  
469 present work, the possibility of the A1493(h44)/degeneracy rebalancing is based on this

470 optimization, implying that h44 necessarily emerged before the PTC. Our results thus do not  
471 support an early emergence of this catalytic site, as the model of Petrov et al. (2015) suggests.  
472 Another justification of the proposed evolutionary scheme relates to tRNA accommodation,  
473 which is part of the proofreading mechanism, and implies the presence of the PTC: the tRNA  
474 acceptor arm is funnelled by rRNA helices H89 and H90-92, that are both rooted on this  
475 catalytic site (Burakovsky et al. 2010, Rakauskaitė and Dinman 2011). Also, proofreading  
476 implies a commitment of the ribosome to peptide bond formation once the 3' end of an  
477 aminoacyl-tRNA reaches the peptidyl-tRNA, which implies high  $k'_{pep}$  aminoacylS of similar values,  
478 thus the PTC. We conclude that in the timeline of evolution, the completion of the PTC occurred  
479 after the appearance of degeneracy (residues A1493 & A1492) and before EF-Tu/proofreading,  
480 the induced-fit mechanism (30S closure) controlled by G530 being necessarily a latecomer.  
481 One of the most striking structural aspect of the decoding center is that its three nucleotides are  
482 distributed on two different helices far apart from each other, implying that their simultaneous  
483 appearance in the course of the early evolution of the ribosome is highly unlikely. In agreement  
484 with evolutionary models (Harish and Caetano-Anollés 2012, Petrov et al. 2015), and with the  
485 dynamics of the decoding center (Loveland et al. 2017, Fislage et al. 2018), the major  
486 conclusion of the present analysis is that degeneracy arose when residues A1493 and A1492  
487 took their function on helix h44 at an early stage of the evolution of the ribosome.

488

#### 489 **Acknowledgements**

490 We wish to thank A. Korostelev for comments and suggestions on the manuscript. We are also  
491 grateful to D. Gautheret and A. Libchaber for ongoing support.

492

#### 493 **Author contributions**

494 JL performed the research, discussed the results and wrote the manuscript. SY provided logistic  
495 support, discussed the results and proofread the manuscript.

496

#### 497 **Material and methods**

##### 498 *Analysis of ribosome structures*

499 Crystal and cryo-EM structures of ribosomes complexed with tRNAs or tRNA fragments  
500 (Murphy FV 4th, Ramakrishnan V. 2004, Loveland et al. 2017, Fislage et al. 2018) were  
501 retrieved from the *protein databank* website and analysed with the *Pymol* software.

502

503 **References**

504

505 Auffinger P, Westhof E. 2001. An extended structural signature for the tRNA anticodon loop.  
506 RNA 7: 334-341.

507

508 Blanchet S, Cornu D, Hatin I, Grosjean H, Bertin P, Namy O. 2018. Deciphering the reading  
509 of the genetic code by near-cognate tRNA. Proc Natl Acad Sci U S A. 115: 3018-3023.

510

511 Bonitz SG, Berlani R, Coruzzi G, Li M, Macino G, Nobrega FG, Nobrega MP, Thalenfeld BE,  
512 Tzagoloff A. 1980. Codon recognition rules in yeast mitochondria. Proc Natl Acad Sci U S A.  
513 77: 3167-3170.

514

515 Burakovsky DE, Sergiev PV, Steblyanko MA, Kubarenko AV, Konevega AL, Bogdanov AA,  
516 Rodnina MV, Dontsova OA. 2011. Mutations at the accommodation gate of the ribosome  
517 impair RF2-dependent translation termination. RNA 17: 855-864.

518

519 Eigen M, Schuster P. 1978. The hypercycle. A principle of natural self-organization. Part C:  
520 The realistic hypercycle. Naturwissenschaften 65, 341-369.

521

522 Fislage M, Zhang J, Brown ZP, Mandava CS, Sanyal S, Ehrenberg M, Frank J. 2018. Cryo-EM  
523 shows stages of initial codon selection on the ribosome by aa-tRNA in ternary complex with  
524 GTP and the GTPase-deficient EF-TuH84A. Nucleic Acids Res. 46: 5861-5874.

525

526 Frank J, Gao H, Sengupta J, Gao N, Taylor DJ. 2007. The process of mRNA-tRNA  
527 translocation. Proc Natl Acad Sci 104: 19671-19678.

528

529 Freier SM, Kierzek R, Jaeger JA, Sugimoto N, Caruthers MH, Neilson T, Turner DH. 1986.  
530 Improved free-energy parameters for predictions of RNA duplex stability. Proc Natl Acad Sci  
531 U S A. 83: 9373-9377.

532

533 Grosjean H, Westhof E. 2016. An integrated, structure- and energy-based view of the genetic  
534 code. Nucleic Acids Res. 44: 8020-8040.

535

536 Grosjean H, Houssier C, Romby P, and Marquet R. 1998. Modulatory role of modified  
537 nucleotides in RNA loop-loop interaction. In Modification and editing of RNA (eds. H.  
538 Grosjean and R. Benne), pp. 113-133. ASM Press, Washington, DC.

539

540 Harish A, Caetano-Anollés G. 2012. Ribosomal history reveals origins of modern protein  
541 synthesis. PLoS One 7: e32776.

542

543 Hopfield JJ. 1974. Kinetic proofreading: a new mechanism for reducing errors in biosynthetic  
544 processes requiring high specificity. Proc Natl Acad Sci U S A. 71: 4135-4139.

545

546 Ikehara K, Omori Y, Arai R, Hirose A. 2002. A novel theory on the origin of the genetic code:  
547 a GNC-SNS hypothesis. J Mol Evol. 54: 530-538.

548

549 Jenner LB, Demeshkina N, Yusupova G, Yusupov M. 2010. Structural aspects of messenger  
550 RNA reading frame maintenance by the ribosome. Nat Struct Mol Biol. 17: 555-560.

551

552 Johansson M, Jeong KW, Trobro S, Strazewski P, Åqvist J, Pavlov MY, Ehrenberg M 2011.  
553 pH-sensitivity of the ribosomal peptidyl transfer reaction dependent on the identity of the A-  
554 site aminoacyl-tRNA. *Proc Natl Acad Sci U S A*. 108: 79-84.  
555

556 Juette MF, Terry DS, Wasserman MR, Altman RB, Zhou Z, Zhao H, Blanchard SC. 2016.  
557 Single-molecule imaging of non-equilibrium molecular ensembles on the millisecond timescale.  
558 *Nat Methods*. 13: 341-344.  
559

560 Katunin VI, Savelsbergh A, Rodnina MV, Wintermeyer W. 2002. Coupling of GTP hydrolysis  
561 by elongation factor G to translocation and factor recycling on the ribosome. *Biochemistry* 41:  
562 12806-12812.  
563

564 Kavaliauskas D, Chen C, Liu W, Cooperman BS, Goldman YE, Knudsen CR. 2018. Structural  
565 dynamics of translation elongation factor Tu during aa-tRNA delivery to the ribosome. *Nucleic  
566 Acids Res*. 46: 8651-8661.  
567

568 Khade PK, Shi X, Joseph S. 2013. Steric complementarity in the decoding center is important  
569 for tRNA selection by the ribosome. *J Mol Biol*. 425: 3778-3789.  
570

571 Konevega AL, Soboleva NG, Makhno VI, Semenov YP, Wintermeyer W, Rodnina MV and  
572 Katunin VI. 2004. Purine bases at position 37 of tRNA stabilize codon-anticodon interaction  
573 in the ribosomal A site by stacking and Mg<sup>2+</sup>-dependent interactions. *RNA* 10: 90-101.  
574

575 Lagerkvist, U. 1978. "Two out of three": An alternative method for codon reading. *Proc. Natl.  
576 Acad. Sci*. 75: 1759-1762.  
577

578 Lehmann J. 2000. Physico-chemical constraints connected with the coding properties of the  
579 genetic system. *J Theor Biol*. 202: 129-144.  
580

581 Lehmann J, Libchaber A. 2008. Degeneracy of the genetic code and stability of the base pair at  
582 the second position of the anticodon. *RNA* 14: 1264-1269.  
583

584 Lehmann J, Cibils M, Libchaber A. 2009. Emergence of a code in the polymerization of amino  
585 acids along RNA templates. *PLoS One*. 4: e5773.  
586

587 Lehmann J. 2017. Induced fit of the peptidyl-transferase center of the ribosome and  
588 conformational freedom of the esterified amino acids. *RNA* 23: 229-239.  
589

590 Lehmann J. 2018. Genetic Code Degeneracy and Amino Acid Frequency in Proteomes. Book  
591 chapter in: *Biodiversity and Evolution*, pages 89-107. Edited by Philippe Grandcolas and  
592 Marie-Christine Maurel. Elsevier.  
593

594 Ling C, Ermolenko DN. 2016. Structural insights into ribosome translocation. *Wiley Interdiscip  
595 Rev RNA*. 7: 620-636.  
596

597 Liu G, Song G, Zhang D, Zhang D, Li Z, Lyu Z, Dong J, Achenbach J, Gong W, Zhao XS,  
598 Nierhaus KH, Qin Y. 2014. EF-G catalyzes tRNA translocation by disrupting interactions  
599 between decoding center and codon-anticodon duplex. *Nat Struct Mol Biol*. 21: 817-824.  
600

601 Loveland AB, Demo G, Grigorieff N, Korostelev AA. 2017. Ensemble cryo-EM elucidates the  
602 mechanism of translation fidelity. *Nature* 546:113-117.  
603  
604 Murphy FV 4th, Ramakrishnan V. 2004. Structure of a purine-purine wobble base pair in the  
605 decoding center of the ribosome. *Nat Struct Mol Biol.* 11: 1251-1252.  
606  
607 Näsvalld SJ, Chen P, Björk GR. 2004. The modified wobble nucleoside uridine-5-oxyacetic acid  
608 in tRNA<sup>Pro</sup>(cmo5UGG) promotes reading of all four proline codons in vivo. *RNA* 10: 1662-  
609 1673.  
610  
611 Ninio J. 1975. Kinetic amplification of enzyme discrimination. *Biochimie* 57: 587-595.  
612  
613 Ogle JM, Brodersen DE, Clemons WM Jr, Tarry MJ, Carter AP, Ramakrishnan V. 2001.  
614 Recognition of cognate transfer RNA by the 30S ribosomal subunit. *Science* 292: 897-902.  
615  
616 Ogle JM, Murphy FV 4th, Tarry MJ, Ramakrishnan V. 2002. Selection of tRNA by the  
617 ribosome requires a transition from an open to a closed form. *Cell* 111: 721-732.  
618  
619 Pape T, Wintermeyer W, Rodnina M. 1999. Induced fit in initial selection and proofreading of  
620 aminoacyl-tRNA on the ribosome. *EMBO J.* 18: 3800-3807.  
621  
622 Peng BZ, Bock LV, Belardinelli R, Peske F, Grubmüller H, Rodnina MV. 2019. Active role of  
623 elongation factor G in maintaining the mRNA reading frame during translation. *Sci. Adv.* 5:  
624 eaax8030.  
625  
626 Petrov AS, Gulen B, Norris AM, Kovacs NA, Bernier CR, Lanier KA, Fox GE, Harvey SC,  
627 Wartell RM, Hud NV, Williams LD. 2015. History of the ribosome and the origin of translation.  
628 *Proc Natl Acad Sci U S A.* 112: 15396-15401.  
629  
630 Quigley GC, Rich A. 1976. Structural domains of transfer RNA molecules. *Science* 194: 796-  
631 806.  
632  
633 Rakauskaitė R, Dinman JD. 2011. Mutations of highly conserved bases in the  
634 peptidyltransferase center induce compensatory rearrangements in yeast ribosomes. *RNA* 17:  
635 855-864.  
636  
637 Rogalski M, Karcher D, Bock R. 2008. Superwobbling facilitates translation with reduced  
638 tRNA sets. *Nat Struct Mol Biol.* 15: 192-198.  
639  
640 Satpati P, Sund J, Åqvist J. 2014. Structure-based energetics of mRNA decoding on the  
641 ribosome. *Biochemistry* 53: 1714-1722.  
642  
643 Savir Y, Tlusty T. 2007. Conformational proofreading: the impact of conformational changes  
644 on the specificity of molecular recognition. *PLoS One* 2: e468.  
645  
646 Savir Y, Tlusty T. 2013. The ribosome as an optimal decoder: a lesson in molecular recognition.  
647 *Cell* 153: 471-479.  
648

649 Schmeing TM, Voorhees RM, Kelley AC, Gao YG, Murphy FV 4th, Weir JR, Ramakrishnan  
650 V. 2009. The crystal structure of the ribosome bound to EF-Tu and aminoacyl-tRNA. *Science*.  
651 326: 688-694.  
652

653 Schmeing TM, Voorhees RM, Kelley AC, Ramakrishnan V. 2011. How mutations in tRNA  
654 distant from the anticodon affect the fidelity of decoding. *Nat Struct Mol Biol*. 18: 432-436.  
655

656 Schrode P, Huter P, Clementi N, Erlacher M. 2017. Atomic mutagenesis at the ribosomal  
657 decoding site. *RNA Biol*. 14: 104-112.  
658

659 Suzuki T, Yashiro Y, Kikuchi I, Ishigami Y, Saito H, Matsuzawa I, Okada S, Mito M, Iwasaki  
660 S, Ma D, Zhao X, Asano K, Lin H, Kirino Y, Sakaguchi Y, Suzuki T. 2020. Complete chemical  
661 structures of human mitochondrial tRNAs. *Nat Commun*. 11: 4269.  
662

663 Taylor DJ, Nilsson J, Merrill AR, Andersen GR, Nissen P, Frank J. 2007. Structures of modified  
664 eEF2 80S ribosome complexes reveal the role of GTP hydrolysis in translocation. *EMBO J* 26:  
665 2421-2431.  
666

667 Thompson RC, Stone PJ. 1977. Proofreading of the codon-anticodon interaction on ribosomes.  
668 *Proc Natl Acad Sci U S A*. 74: 198-202.  
669

670 Voorhees RM, Schmeing TM, Kelley AC, Ramakrishnan V. 2010. The mechanism for  
671 activation of GTP hydrolysis on the ribosome. *Science* 330: 835-838.  
672

673 Wang J. and Lehmann J. 2017. Commaless Code. In *Reference Module in Life Sciences*,  
674 Elsevier.  
675

676 Weixlbaumer A, Murphy FV 4th, Dziergowska A, Malkiewicz A, Vendeix FA, Agris PF,  
677 Ramakrishnan V. 2007. Mechanism for expanding the decoding capacity of transfer RNAs by  
678 modification of uridines. *Nat Struct Mol Biol*. 14: 498-502.  
679

680 Yarus M, Valle M, Frank J. 2003. A twisted tRNA intermediate sets the threshold for decoding.  
681 *RNA* 9: 384-385.  
682

683 Yokoyama S, Watanabe T, Murao K, Ishikura H, Yamaizumi Z, Nishimura S, Miyazawa T.  
684 1985. Molecular mechanism of codon recognition by tRNA species with modified uridine in  
685 the first position of the anticodon. *Proc Natl Acad Sci U S A*. 82: 4905-4909.  
686

687 Yokoyama, S. and Nishimura, S. 1995. Modified nucleosides and codon recognition. In *tRNA:*  
688 *Structure, biosynthesis, and function* (eds. D. Söll and U. RajBhandary), Chap. 12, pp. 207–  
689 223. AMSPress, Washington, DC.  
690

691 Zhou J, Lancaster L, Donohue JP, Noller HF. 2019. Spontaneous ribosomal translocation of  
692 mRNA and tRNAs into a chimeric hybrid state. *Proc Natl Acad Sci U S A*. 116: 7813-7818.
